# Supplementary material for: Analysing the evolutional and functional differentiation of four types of Daphnia magna cryptochrome in Drosophila circadian clock
Source: PubMed Central journal article supplement (PMC6586792; doi:10.1038/s41598-019-45410-w), 2019-06-20
Supplement: 41598_2019_45410_MOESM1_ESM.pdf [file 41598_2019_45410_MOESM1_ESM.pdf]

# Analysing the evolutionary and functional differentiation of four types of *Daphnia*

## *magna* cryptochrome in *Drosophila* circadian clock:

### Supplementary Information

Yohei Nitta, Sayaka Matsui, Yukine Kato, Yosuke Kaga, Kenkichi Sugimoto and

Atsushi Sugie

#### Supplementary data

#### Supplementary Table 1. PCR primers for UAS vector construction

| Supplemental Table 1. PCR primers for UAS vector construction |                                                                        |
|---------------------------------------------------------------|------------------------------------------------------------------------|
| oligo name                                                    | Sequence (5')                                                          |
| cry-A_CDS-F (in-fusion 20xUSA)                                | tctgaagaggacttgaatattctttggttccgccc                                    |
| cry-A_CDS-R (in-fusion 20xUSA)                                | aacgattcattcttagacgattcattctagattagaac                                 |
| cry-B_CDS-F (in-fusion 20xUSA)                                | tctgaagaggactttagtagctatgagctgcacc                                     |
| cry-B_CDS-R (in-fusion 20xUSA)                                | aacgattcattcttagacgattcattctagattagttc                                 |
| cry-C_CDS-F (in-fusion 20xUSA)                                | tctgaagaggacttgaataaaccagtagtcattca                                    |
| cry-C_CDS-R (in-fusion 20xUSA)                                | aacgattcattcttagacgattcattctagattatttc                                 |
| cry-D_CDS-F (in-fusion 20xUSA)                                | tctgaagaggacttgcacaagattgtaaacatgaca                                   |
| cry-D_CDS-R (in-fusion 20xUSA)                                | aacgattcattcttagacgattcattctagattattttt                                |
| 20xUAS+sp21+myc Sense                                         | gCGGCCGCGGCTCGGAGAActTAAAAAAAAAAATCAAAATGGAGCAAAGCTCATTCTGGAAGAGGACTTG |
| 20xUAS+sp21+myc AntiSense                                     | CAAGTCCTCTCAGAAATGAGCTTTTGCTCCATTTTGATTTTTTTTTTAAGTTCTCGAGCCGCGGCCG    |
| F Primer (XhoI+xyn21)                                         | CTCGGAGAActTAAAAAAAAAAATCAAAATG                                        |

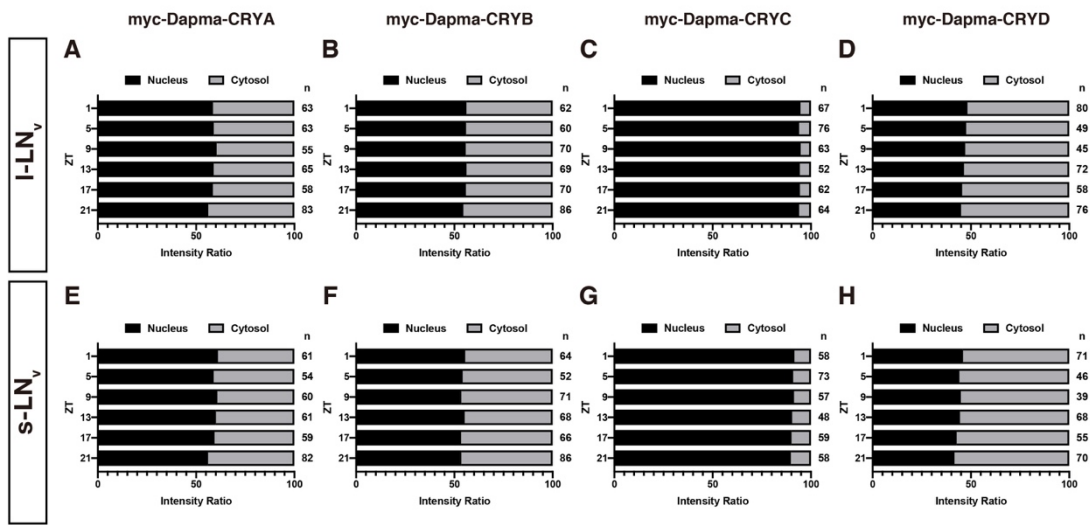

**Supplementary Figure 1. Subcellular localisation of Dapma-CRYs at each time point.** The ratio of the intensity in the nucleus and the cytoplasm of myc-tagged Dapma-CRYs at each zeitgeber time point (ZT 1, 5, 9, 13, 17, 21). **(A-D)** Intensity ratio of Dapma-CRYs in I-LN<sub>v</sub>. **(E-H)** Intensity ratio of Dapma-CRYs in s-LN<sub>v</sub>. n represents the number of cells quantified.
